# Supplementary material
Source: PubMed Central journal article supplement (PMC6418460)

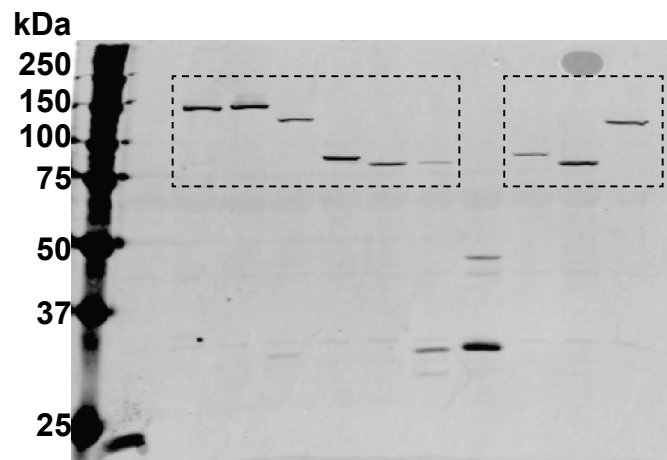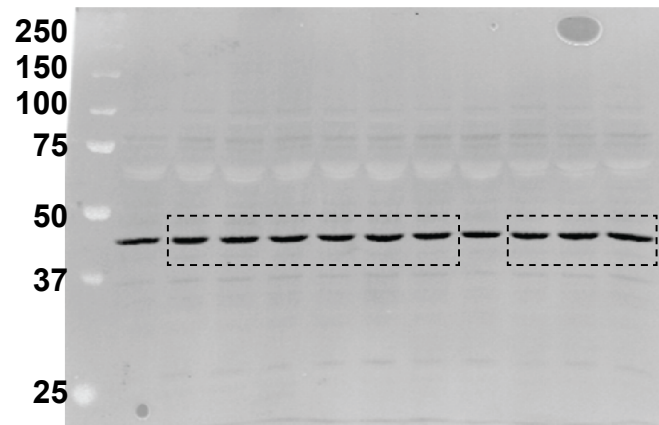

Supplement: EMBJ-38-e99669-s003.pdf [file EMBJ-38-e99669-s003.pdf]

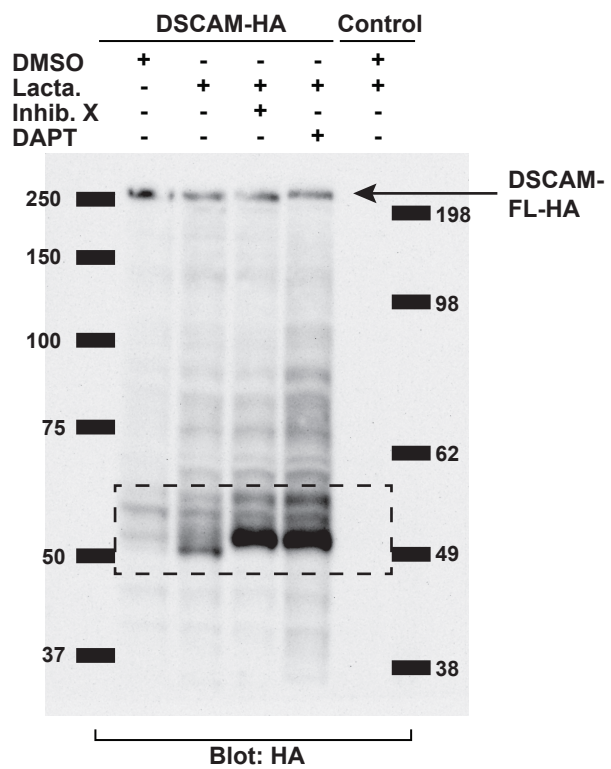

Supplement: EMBJ-38-e99669-s004.pdf [file EMBJ-38-e99669-s004.pdf]
